# Supplementary material
Source: publisher figshare collection journal article supplement (https://karger.figshare.com/articles/dataset/_/5126860)
Supplement: Supplementary file 1 [file 1]

**Supplementary Table 1a.** Age-standardized annual prevalence estimates of Parkinsonism per 100 persons (≥ 20 years old) in Ontario

| Case Definition                                | 2000 | 2001 | 2002 | 2003 | 2004 | 2005 | 2006 | 2007 | 2008 | 2009 | 2010 |
|------------------------------------------------|------|------|------|------|------|------|------|------|------|------|------|
| 2 P in 1 y                                     | 0.20 | 0.21 | 0.21 | 0.21 | 0.21 | 0.22 | 0.22 | 0.22 | 0.22 | 0.22 | 0.23 |
| 2 P in 2 y                                     | 0.21 | 0.21 | 0.22 | 0.22 | 0.22 | 0.23 | 0.23 | 0.23 | 0.23 | 0.23 | 0.23 |
| H or 2 P in 1 y                                | 0.24 | 0.25 | 0.25 | 0.25 | 0.25 | 0.26 | 0.26 | 0.26 | 0.26 | 0.26 | 0.26 |
| (H or (2 P in 1 y)) or (1 Rx and (1 H or 1 P)) | 0.27 | 0.27 | 0.28 | 0.28 | 0.28 | 0.29 | 0.29 | 0.28 | 0.28 | 0.28 | 0.29 |
| (2 P in 1 y) or (1 Rx and 1 P)                 | 0.24 | 0.24 | 0.25 | 0.25 | 0.25 | 0.25 | 0.26 | 0.26 | 0.26 | 0.26 | 0.26 |
| (2 P in 1 y) or (1 Rx and (1 P) +/- 6 months)  | 0.23 | 0.24 | 0.24 | 0.24 | 0.25 | 0.25 | 0.25 | 0.25 | 0.25 | 0.25 | 0.25 |

**Supplementary Table 1b.** Age-standardized annual incidence estimates of Parkinsonism per 1000 persons (≥ 20 years old) in Ontario

| Case Definition                                | 2000 | 2001 | 2002 | 2003 | 2004 | 2005 | 2006 | 2007 | 2008 | 2009 | 2010 |
|------------------------------------------------|------|------|------|------|------|------|------|------|------|------|------|
| 2 P in 1 y                                     | 0.32 | 0.29 | 0.29 | 0.28 | 0.28 | 0.30 | 0.29 | 0.28 | 0.28 | 0.27 | 0.27 |
| 2 P in 2 y                                     | 0.33 | 0.30 | 0.31 | 0.29 | 0.28 | 0.32 | 0.30 | 0.29 | 0.29 | 0.28 | 0.28 |
| H or 2 P in 1 y                                | 0.42 | 0.40 | 0.40 | 0.36 | 0.36 | 0.38 | 0.34 | 0.33 | 0.33 | 0.33 | 0.34 |
| (H or (2 P in 1 y)) or (1 Rx and (1 H or 1 P)) | 0.46 | 0.43 | 0.44 | 0.41 | 0.40 | 0.42 | 0.38 | 0.38 | 0.37 | 0.36 | 0.37 |
| (2 P in 1 y) or (1 Rx and 1 P)                 | 0.38 | 0.35 | 0.36 | 0.34 | 0.34 | 0.36 | 0.34 | 0.34 | 0.33 | 0.32 | 0.33 |
| (2 P in 1 y) or (1 Rx and (1 P) +/- 6 months)  | 0.37 | 0.34 | 0.35 | 0.33 | 0.33 | 0.35 | 0.33 | 0.33 | 0.32 | 0.31 | 0.32 |

P= physician billing code; y = years; H = hospitalization diagnosis code; Rx = prescription including levodopa drugs, MAO-B inhibitors, dopamine agonists and COMT inhibitors.

**Supplementary Table 2a.** Age-standardized annual prevalence estimates of Parkinsonism per 100 persons (≥ 65 years old) in Ontario

| Case Definition                               | 2000 | 2001 | 2002 | 2003 | 2004 | 2005 | 2006 | 2007 | 2008 | 2009 | 2010 |
|-----------------------------------------------|------|------|------|------|------|------|------|------|------|------|------|
| 2 P in 1 y                                    | 1.04 | 1.05 | 1.06 | 1.07 | 1.07 | 1.08 | 1.09 | 1.09 | 1.09 | 1.09 | 1.09 |
| 2 P in 2 y                                    | 1.08 | 1.09 | 1.10 | 1.11 | 1.11 | 1.12 | 1.13 | 1.13 | 1.13 | 1.13 | 1.13 |
| H or 2 P in 1 y                               | 1.24 | 1.26 | 1.27 | 1.26 | 1.26 | 1.26 | 1.26 | 1.24 | 1.24 | 1.23 | 1.23 |
| 1 Rx and (1 H or 1 P) +/- 6 months            | 1.12 | 1.12 | 1.12 | 1.12 | 1.12 | 1.13 | 1.13 | 1.12 | 1.12 | 1.11 | 1.11 |
| (2 P in 1 y) or (1 Rx and (1 P) +/- 6 months) | 1.24 | 1.25 | 1.26 | 1.26 | 1.26 | 1.27 | 1.28 | 1.27 | 1.27 | 1.27 | 1.26 |
| 1 Rx and (1 P) +/- 6 months                   | 1.08 | 1.09 | 1.09 | 1.09 | 1.10 | 1.11 | 1.10 | 1.10 | 1.10 | 1.09 | 1.08 |

**Supplementary Table 2b.** Age-standardized annual incidence estimates of Parkinsonism per 1000 persons (≥ 65 years old) in Ontario

| Case Definition                               | 2000 | 2001 | 2002 | 2003 | 2004 | 2005 | 2006 | 2007 | 2008 | 2009 | 2010 |
|-----------------------------------------------|------|------|------|------|------|------|------|------|------|------|------|
| 2 P in 1 y                                    | 1.77 | 1.63 | 1.61 | 1.54 | 1.55 | 1.69 | 1.62 | 1.62 | 1.58 | 1.56 | 1.52 |
| 2 P in 2 y                                    | 1.84 | 1.69 | 1.69 | 1.62 | 1.59 | 1.76 | 1.66 | 1.67 | 1.62 | 1.61 | 1.57 |
| H or 2 P in 1 y                               | 2.39 | 2.24 | 2.13 | 1.98 | 1.95 | 2.07 | 1.94 | 1.92 | 1.89 | 1.88 | 1.88 |
| 1 Rx and (1 H or 1 P) +/- 6 months            | 1.93 | 1.80 | 1.78 | 1.75 | 1.75 | 1.81 | 1.73 | 1.68 | 1.74 | 1.67 | 1.64 |
| (2 P in 1 y) or (1 Rx and (1 P) +/- 6 months) | 2.12 | 1.94 | 1.95 | 1.88 | 1.90 | 1.99 | 1.90 | 1.91 | 1.86 | 1.81 | 1.80 |
| 1 Rx and (1 P) +/- 6 months                   | 1.82 | 1.70 | 1.70 | 1.69 | 1.69 | 1.76 | 1.65 | 1.64 | 1.67 | 1.58 | 1.57 |

P= physician billing code; y = years; H = hospitalization diagnosis code; Rx = prescription including levodopa drugs, MAO-B inhibitors, dopamine agonists and COMT inhibitors.
